# Supplementary material
Source: PubMed Central journal article supplement (PMC3207396)
Supplement: supp_M111.274423_jbc.M111.274423-1.pdf [file supp_M111.274423_jbc.M111.274423-1.pdf]

**Supplemental Material to:**

**Stepwise adaptations to low temperatures as revealed by multiple mutants of a psychrophilic  $\alpha$ -amylase from an Antarctic bacterium**

**Alexandre Cipolla<sup>‡</sup>, Salvino D'Amico<sup>‡</sup>, Roya Barumandzadeh<sup>§</sup>,**

**André Matagne<sup>§</sup> and Georges Feller<sup>‡1</sup>**

*From the <sup>‡</sup>Laboratory of Biochemistry and the <sup>§</sup>Laboratory of Enzymology and Protein Folding, Centre for Protein Engineering, University of Liège, B-4000 Liège-Sart Tilman, Belgium*

**Contents**

|                               |                                                                    |
|-------------------------------|--------------------------------------------------------------------|
| <b>Supplemental Fig. S1:</b>  | <b>Sequence alignment of <math>\alpha</math>-amylases</b>          |
| <b>Supplemental Fig. S2:</b>  | <b>Stern-Volmer plots of fluorescence quenching</b>                |
| <b>Supplemental Fig. S3:</b>  | <b>Unfolding reversibility in DSC</b>                              |
| <b>Supplemental Table S1:</b> | <b>Thermodynamic parameters from DSC</b>                           |
| <b>Supplemental Fig. S4:</b>  | <b>Stability curves</b>                                            |
| <b>Supplemental Fig. S5:</b>  | <b>Stability of <math>\alpha</math>-amylase-acarbose complexes</b> |
| <b>Supplemental Table S2:</b> | <b>Stability parameters of acarbose complexes</b>                  |

|        |                                                                |     |
|--------|----------------------------------------------------------------|-----|
| AHA    | -----TPTTFVHLFEWNWQDVAQECEQYLGPKGYAAVQVSPNEHITGS----QWWT       | 48  |
| Mut5   | -----TPTTFVHLFEWNWQDVAQECEQYLGPKGYAAVQVSPNEHITGS----QWWT       | 48  |
| Mut5CC | -----TPTTFVHLFEWNWQDVAQECEQYLGPKGYAAVQVSPNEHITGS----QWWT       | 48  |
| PPA    | QYAPQTSGRTSIVHLFEWRWVDIALECERYLGPKGFGGVQVSPNENIVVTNPSRPWWE     | 60  |
| AHA    | RYQPVSYLESRGGNRAQFIDMVNRCSAAGVDIYVDTLINHMA---AGSGTGT-AGNSFG    | 104 |
| Mut5   | RYQPVSYLESRGGNRAQFIDMVNRCSAAGVDIYVDTLINHMA---AGSGTGT-AGNSFG    | 104 |
| Mut5CC | RYQPVSYLESRGGNRAQFIDMVNRCSAAGVDIYVDTLINHMA---AGSGTGT-AGNSFG    | 104 |
| PPA    | RYQPVSYKLSRSGNENEFDMVTRCANNVGVRIYVDAVINHMCGSGAAAGTGTTCG-SYC    | 119 |
| AHA    | N---KSFP--IYSPQDFHES-CTINNS--DYGNDRYRVQNCELVGLADLDTASRYVQNTI   | 156 |
| Mut5   | N---KSFP--IYSPQDFHES-CTINNS--DYGNDRYRVQNCELVGLADLDTASRYVQNTI   | 156 |
| Mut5CC | N---KSFP--IYSPQDFHES-CTINNS--DYGNDRYRVQNCELVGLADLDTASRYVQNTI   | 156 |
| PPA    | NPGNREFPAVPYSAWDFNDGKCKTASGGIESYNDPYQVRDCQLVGLLDLDALEKRYVRSMI  | 179 |
| AHA    | AAAYINDLQAIQVKGFRFDASKHVAASDIQSLMAKVN-----GS-PVVFQEVVIDQGG     | 206 |
| Mut5   | AAAYINDLQAIQVKGFRFDASKHVAASDIQSLMAKVN-----GS-PVVFQEVVIDQGG     | 206 |
| Mut5CC | AAAYINDLQAIQVKGFRFDASKHVAASDIQSLMAKVN-----GS-PVVFQEVVIDQGG     | 206 |
| PPA    | ADYLNKLLDIGVAGFRIDASKHMWPGDIKAVLDKLNHLNLTNWFPAQSRPFIQEVVIDLGG  | 239 |
| AHA    | EAVGASEYLSLSTGLVTEFKYSTELGNVFRNGS---LAWLSNFGEGWGFMPSSSAVVFVDNH | 263 |
| Mut5   | EAVGASEYLSLSTGLVTEFKYSTELGNVFRNGS---LAWLSNFGEGWGFMPSSSAVVFVDNH | 263 |
| Mut5CC | EAVGASEYLSLSTGLVTEFKYSTELGNVFRNGS---LAWLSNFGEGWGFMPSSSAVVFVDNH | 263 |
| PPA    | EAIQSSEYFGNGRVTEFKYGAKLGTVVRKWSGEKMSYLNWEGEGWGFMPSDRALVFVDNH   | 299 |
| AHA    | DNQRGHGGAGN-VI-TFEDGRLYDLANVFMLAYPYGYPRVMSSYDF----HGDTDA----   | 313 |
| Mut5   | DNQRGHGGAGN-VI-TFEDGRLYDLANVFMLAYPYGYPRVMSSYDF----HGDTDA----   | 313 |
| Mut5CC | DNQRGHGGAGN-VI-TFEDGRLYDLANVFMLAYPYGYPRVMSSYDF----HGDTDA----   | 313 |
| PPA    | DNQRGHG-AGGASILTFWDARLYKVAVGFMMLAHPYGFTTRVMSSYRWARNFVNGQDVNDWI | 358 |
| AHA    | GGPNVPVHN-----NGNLECFASNWKCEHRWSYIAGGVDFRNTADNWAVTNWWDNTNNQ    | 368 |
| Mut5   | GGPNVPVHN-----NGNLECFASNWKCEHRWSYIAGGVDFRNTADNWAVTNWWDNTNNQ    | 368 |
| Mut5CC | GGPNVPVHN-----NGNLECFASNWKCEHRWSYIAGGVDFRNTADNWAVTNWWDNTNNQ    | 368 |
| PPA    | GPPNNGVIKEVTINADTTC-GNDWVCEHRWRQIRNMVWFRN-VVDGQPFANWWANGSNQ    | 416 |
| AHA    | ISFGRGSSGHMAINKEDSTLTATVQTDMASGQYCNVLKGELSADAKSCSGEIVTVNSDGT   | 428 |
| Mut5   | ISFGRGSSGHMAINKEDSTLTATVQTDMASGQYCNVLKGELSADAKSCSGEIVTVNSDGT   | 428 |
| Mut5CC | ISFGRGSSGHMAINKEDSTLTATVQTDMASGQYCNVLKGELSADAKSCSGEIVTVNSDGT   | 428 |
| PPA    | VAFGRGNRGFIVFNDDWQLSSTLQTLPGGTYCDVISGDKVG--NSCTGIKIVYVSSDGT    | 474 |
| AHA    | INLNIG--AWD-AMAIHKNAKLNTSSAS                                   | 453 |
| Mut5   | INLNIG--AWD-AMAIHKNAKLNTSSAS                                   | 453 |
| Mut5CC | INLNIG--AWD-AMAIHKNAKLNTSSAS                                   | 453 |
| PPA    | AQFSISNSAEDPFIAIHAESKL-----                                    | 496 |

**Supplemental Figure S1: Sequence alignment of the psychrophilic AHA, its multiple mutants Mut5 and Mut5CC, and of the mesophilic PPA.** The mutations engineered in Mut5 and in Mut5CC are shown in red. The 24 conserved residues forming the active site cleft are shown in blue.

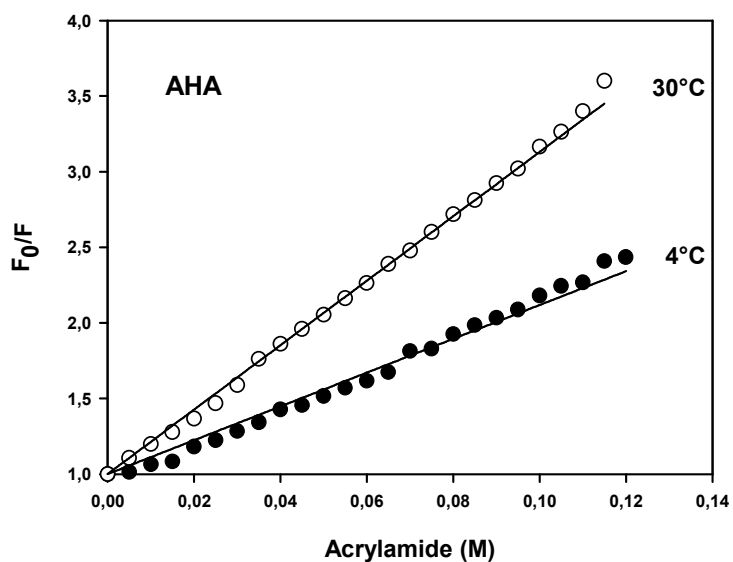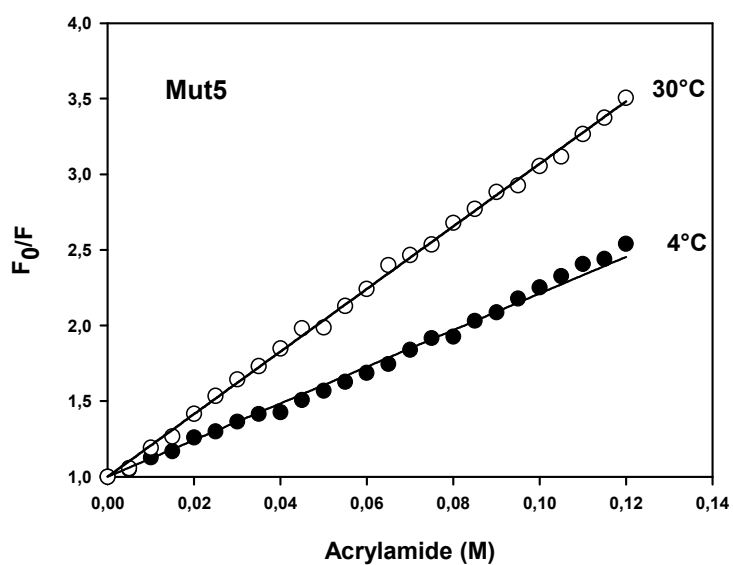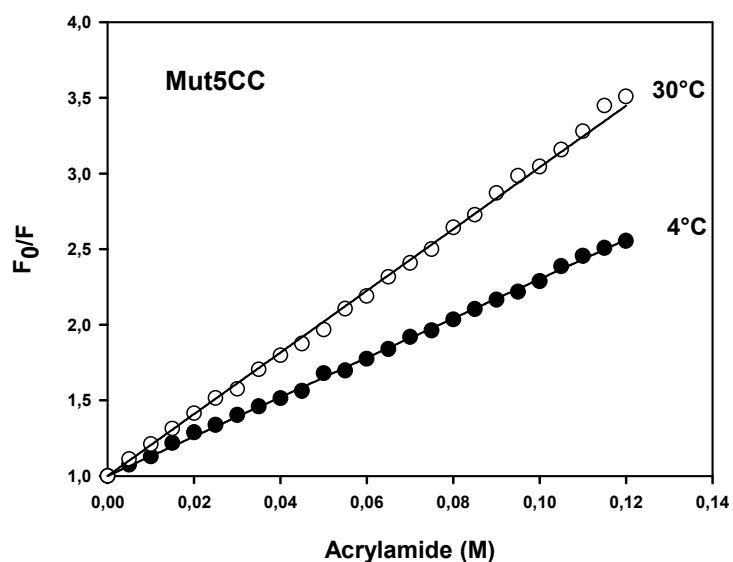

**Supplemental Figure S2: Stern-Volmer plots of fluorescence quenching by acrylamide.** The quenching constant  $K_{SV}$  values corresponding to the plot slope are 11.7, 12.1 and 13.0  $M^{-1}$  at 4°C and 21.3, 20.7 and 20.4  $M^{-1}$  at 30°C for AHA, Mut5 and Mut5CC, respectively.

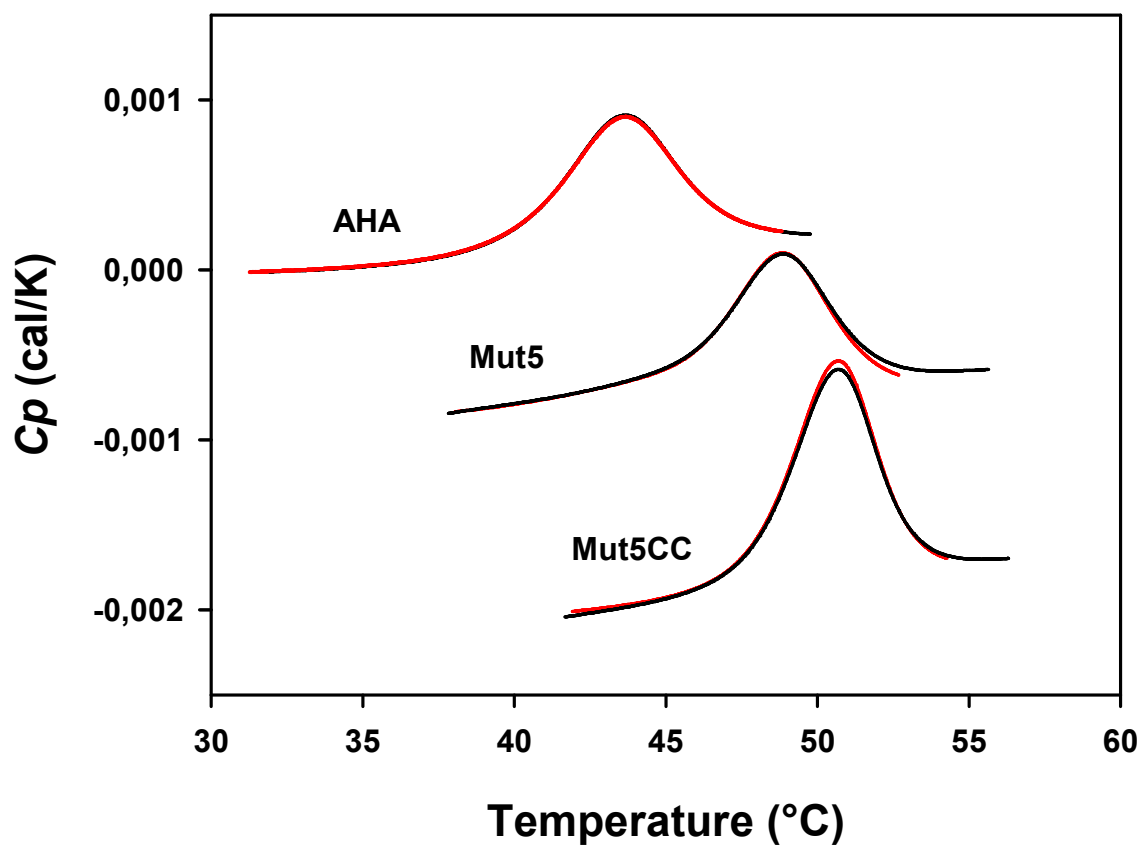

**Supplemental Figure S3: Unfolding reversibility of the mutants in the presence of a nondetergent sulfobetaine.** Thermograms were recorded in 30 mM Mops, 50 mM NaCl, 1 mM Ca Cl<sub>2</sub>, 1 M 3-(1-pyridinio)-1-propanesulfonate, pH 7.2 at a scan-rate of 60 K h<sup>-1</sup>. Red traces: first up-scans interrupted after completion of the unfolding transition. Black traces: second up-scans performed after sample cooling. Raw data have been displaced along the Y axis for clarity.

## Supplemental TABLE S1

Thermodynamic parameters of unfolding derived from reversible DSC endotherms

|                  | $T_m$<br>°C | $\Delta H_{cal}$<br>kcal mol <sup>-1</sup> | $\Delta H_{eff}$<br>kcal mol <sup>-1</sup> | $\Delta H_{cal} / \Delta H_{eff}$ | Reversibility<br>% |
|------------------|-------------|--------------------------------------------|--------------------------------------------|-----------------------------------|--------------------|
| AHA              | 44.0        | 214                                        | 203                                        | 1.05                              | >99                |
| Mut5             | 49.7        | 233                                        | 204                                        | 1.14 <sup>1</sup>                 | >98                |
| Mut5CC           | 52.2        | 280                                        | 270                                        | 1.04                              | >98                |
| PPA <sup>2</sup> | 65.6        | 319                                        | -- <sup>3</sup>                            | -- <sup>3</sup>                   | none               |

<sup>1</sup> despite a ratio close to 1, unfolding deviates from a two-state model as a result of an asymmetric transition

<sup>2</sup> data from (44)

<sup>3</sup> not applicable, biphasic transition

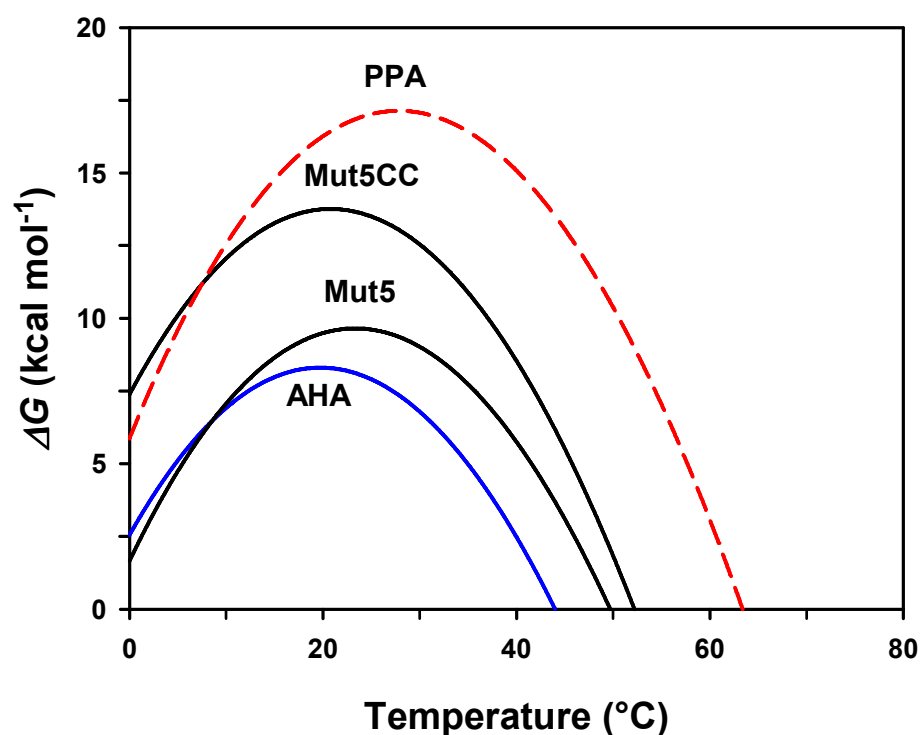

**Supplemental Figure S4: Stability curves calculated from DSC data.** The Gibbs free energy of unfolding was calculated as described (22) by the relation:

$$\Delta G(T) = \Delta H_{cal}(1-T/T_m) + \Delta C_p(T-T_m) - T\Delta C_p \ln(T/T_m)$$

using  $\Delta C_p = 8.47 \text{ kcal mol}^{-1} \text{ K}^{-1}$  as determined experimentally for AHA (44).

Dashed, estimation of PPA stability from its irreversible unfolding parameters.

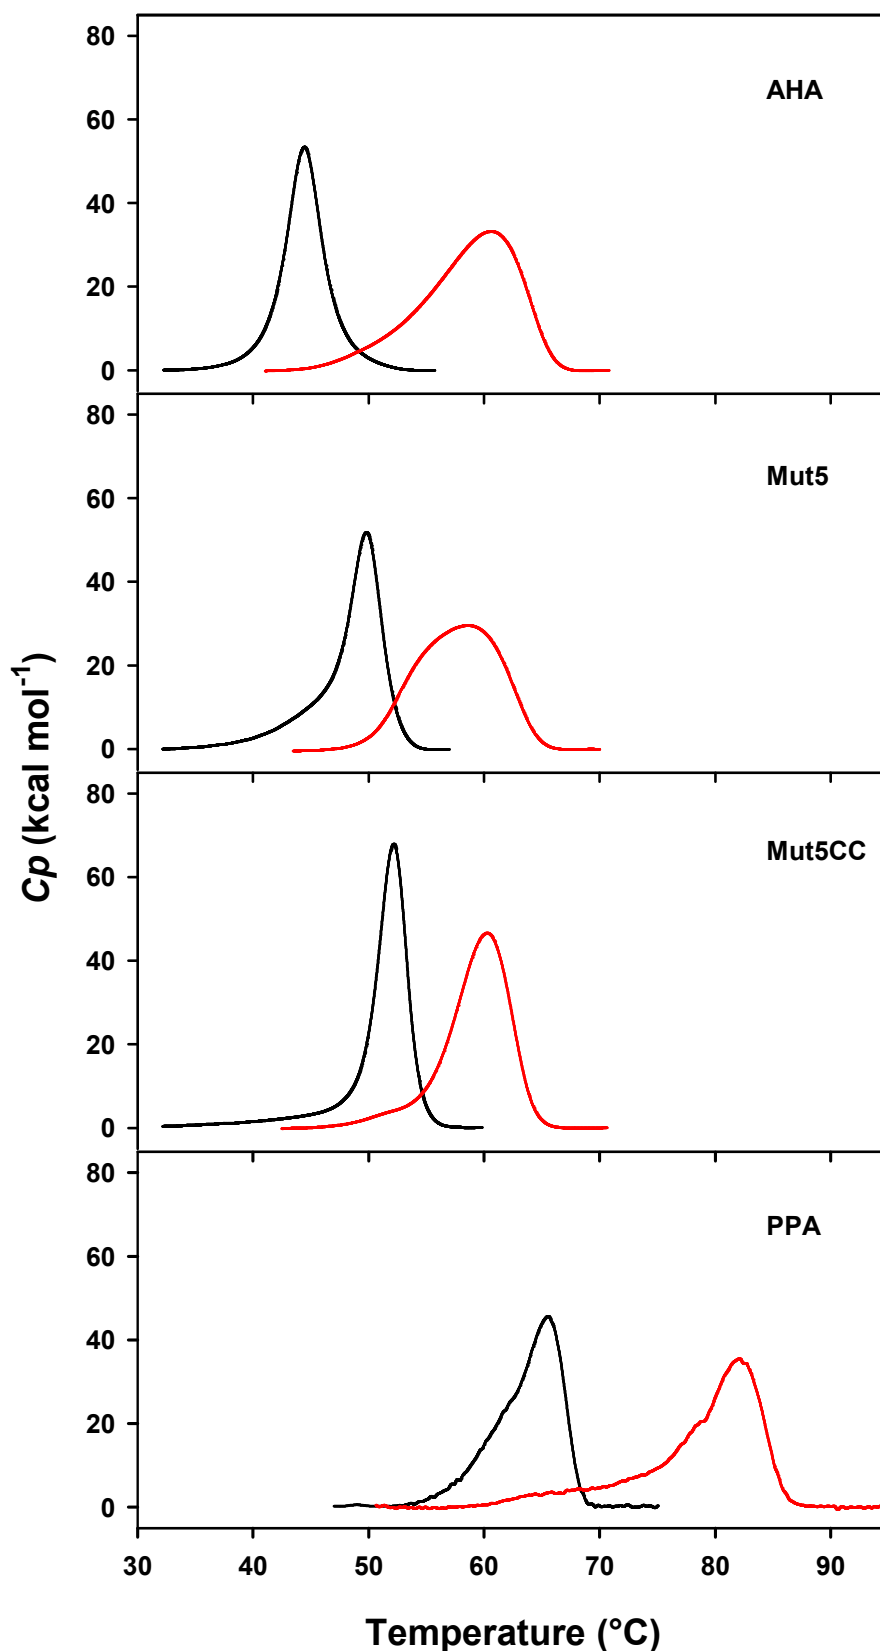

**Supplemental Figure S5: Stability of  $\alpha$ -amylase-acarbose complexes.** DSC endotherms of  $\alpha$ -amylases in the free state (black lines) and in complex with the transition state analog acarbose (red lines).  $T_{max}$  corresponds to the top of the transition and  $\Delta H_{cal}$  to the surface below the transition (Table S2). Baseline subtracted data have been normalized for protein concentration.

**Supplemental TABLE S2**

Microcalorimetric parameters of thermal unfolding for  $\alpha$ -amylases in the free state and in complex with the pseudosaccharide inhibitor acarbose.

|                  | Free enzyme     |                                            | Enzyme-acarbose complex |                                            | $\Delta T_{max}$<br>°C | $\Delta\Delta H_{cal}$<br>kcal mol <sup>-1</sup> |
|------------------|-----------------|--------------------------------------------|-------------------------|--------------------------------------------|------------------------|--------------------------------------------------|
|                  | $T_{max}$<br>°C | $\Delta H_{cal}$<br>kcal mol <sup>-1</sup> | $T_{max}$<br>°C         | $\Delta H_{cal}$<br>kcal mol <sup>-1</sup> |                        |                                                  |
| AHA              | 44.0            | 214                                        | 60.6                    | 329                                        | 16.6                   | 115                                              |
| Mut5             | 49.4            | 229                                        | 58.4                    | 282                                        | 9.0                    | 53                                               |
| Mut5CC           | 51.8            | 277                                        | 60.1                    | 293                                        | 8.3                    | 16                                               |
| PPA <sup>a</sup> | 65.6            | 295                                        | 81.9                    | 306                                        | 16.3                   | 11                                               |

<sup>a</sup> data from (22)
